# Supplementary material for: Cognitive Enhancement Strategies for Older Adults: An Evaluation of Different Training Modalities to Improve Executive Function—A Systematic Review and Meta-Analysis
Source: MDPI journal article supplement (doi:10.3390/jcm13051301), 2024-02-25
Supplement: s1 [file s1]

### Supplementary Material S1a. Keywords used for the search strategy.

| Population   | Intervention            | Outcomes           |
|--------------|-------------------------|--------------------|
| Older adults | Resistance training     | Executive function |
| Aged         | Resistance exercise     |                    |
| Old people   | Strength training       |                    |
| Elderly      | Aerobic training        |                    |
| Aging        | Aerobic exercise        |                    |
| Older people | Cardiovascular exercise |                    |
| Old adults   |                         |                    |
| Seniors      |                         |                    |

### Supplementary Material S1b: Complete literature search.

#### PubMed Search Formula

Date: 19-06-2023

(older adults OR "old people" [Title] OR "older people" [Title] OR "older adults" [Title] OR "old adults" [Title] OR elderly OR senior [Title] OR Aged [Title]) AND ("randomized controlled trial"[Publication Type] OR "controlled clinical trial"[Publication Type] OR "randomized"[Title/Abstract] OR "placebo"[Title/Abstract] OR "clinical trials as topic"[MeSH Terms] OR "randomly"[Title/Abstract] OR "trial"[Title]) AND (Executive function) AND ("aerobic exercise" OR "aerobic training" OR "cardiovascular exercise" OR "resistance training" OR "resistance exercise" OR "strength training")

#### Cochrane Library Search Formula

Date: 26-06-2023

(older adults OR "old people" OR "older people" OR "older adults" OR "old adults" OR "elderly" OR "senior" OR "Aged") in Title Abstract Keyword AND ("aerobic exercise" OR "aerobic training" OR "cardiovascular exercise" OR "resistance training" OR "strength training" OR "resistance exercise") in Title Abstract Keyword AND (Executive function)
